# Supplementary material
Source: publisher figshare collection journal article supplement (https://gsajournals.figshare.com/ndownloader/files/15193469)
Supplement: Supplementary file 1 [file 15193469]

## Sheet: Sheet1
	Supplementary Table 12: Testis genes greater ≥ 2 fold GO terms (Biological, celluar component and Molecular Function)
	p-value	T	Q	Q&T	Q&T/Q	Q&T/T	term ID	t type	t group	t name	t depth
	1.02e-10	101	604	29	0.048	0.287	GO:0015630	CC	2	microtubule cytoskeleton	2
	1.08e-08	112	604	28	0.046	0.25	GO:0007017	BP	3	microtubule-based process	1
	1.95e-08	27	604	14	0.023	0.519	GO:0005929	CC	1	cilium	1
	3.36e-08	133	604	30	0.05	0.226	GO:0044430	CC	2	cytoskeletal part	2
	4.81e-08	24	604	13	0.022	0.542	GO:0030286	CC	2	dynein complex	1
	6.77e-08	29	604	14	0.023	0.483	GO:0042995	CC	1	cell projection	1
	6.77e-08	29	604	14	0.023	0.483	GO:0120025	CC	1	plasma membrane bounded cell projection	2
	7.27e-07	57	604	18	0.03	0.316	GO:0007018	BP	3	microtubule-based movement	2
	5.59e-06	71	604	19	0.031	0.268	GO:0006928	BP	3	movement of cell or subcellular component	1
	1.21e-05	168	604	30	0.05	0.179	GO:0005856	CC	2	cytoskeleton	1
	4.92e-05	38	604	13	0.022	0.342	GO:0005875	CC	2	microtubule associated complex	3
	0.000108	10	604	7	0.012	0.7	GO:0031514	CC	1	motile cilium	2
	0.000449	52	604	14	0.023	0.269	GO:0003777	MF	4	microtubule motor activity	1
	Germ cells greater ≥ 2 fold GO terms (Biological and Molecular Function)
	p-value	T	Q	Q&T	Q&T/Q	Q&T/T	term ID	t type	t group	t name	t depth
	2.18e-10	103	195	18	0.092	0.175	GO:0007049	BP	1	cell cycle	1
	6e-08	64	195	13	0.067	0.203	GO:0022402	BP	1	cell cycle process	1
	5.51e-06	47	195	10	0.051	0.213	GO:0000278	BP	1	mitotic cell cycle	2
	8.87e-06	112	195	14	0.072	0.125	GO:0007017	BP	3	microtubule-based process	1
	1.08e-05	344	195	24	0.123	0.07	GO:0006259	BP	2	DNA metabolic process	1
	0.000185	38	195	8	0.041	0.211	GO:1903047	BP	1	mitotic cell cycle process	2
	0.00029	28	195	7	0.036	0.25	GO:0051301	BP	4	cell division	1
	0.000331	55	195	9	0.046	0.164	GO:0008017	MF	5	microtubule binding	1
	Soma cells greater ≥ 2 fold GO terms (Biological and Molecular Function)
	p-value	T	Q	Q&T	Q&T/Q	Q&T/T	term ID	t type	t group	t name	t depth
	7.39e-27	3661	636	357	0.561	0.098	GO:0003824	MF	6	catalytic activity	2
	7.5e-21	506	636	94	0.148	0.186	GO:0055114	BP	4	oxidation-reduction process	2
	1.73e-20	159	636	50	0.079	0.314	GO:0020037	MF	3	heme binding	2
	2.38e-20	160	636	50	0.079	0.312	GO:0046906	MF	3	tetrapyrrole binding	1
	2.69e-20	620	636	105	0.165	0.169	GO:0016491	MF	6	oxidoreductase activity	3
	5.73e-20	82	636	36	0.057	0.439	GO:0008061	MF	9	chitin binding	1
	9.78e-20	127	636	44	0.069	0.346	GO:0016798	MF	6	hydrolase activity, acting on glycosyl bonds	4
	5.27e-19	157	636	48	0.075	0.306	GO:0005506	MF	8	iron ion binding	1
	1.55e-18	202	636	54	0.085	0.267	GO:0005975	BP	5	carbohydrate metabolic process	1
	1.62e-18	111	636	40	0.063	0.36	GO:0004553	MF	6	hydrolase activity, hydrolyzing O-glycosyl compounds	5
	2.04e-18	142	636	45	0.071	0.317	GO:0004497	MF	6	monooxygenase activity	4
	8.6e-17	168	636	47	0.074	0.28	GO:0016705	MF	6	oxidoreductase activity, acting on paired donors, with incorporation or reduction of molecular oxygen	4
	1.04e-15	374	636	71	0.112	0.19	GO:0048037	MF	3	cofactor binding	1
	2.29e-15	1568	636	177	0.278	0.113	GO:0016787	MF	6	hydrolase activity	3
	7.61e-11	3685	636	311	0.489	0.084	GO:0008152	BP	4	metabolic process	1
	7.15e-09	65	636	22	0.035	0.338	GO:0006030	BP	2	chitin metabolic process	2
	1.98e-08	68	636	22	0.035	0.324	GO:1901071	BP	2	glucosamine-containing compound metabolic process	2
	2.75e-08	69	636	22	0.035	0.319	GO:0006040	BP	2	amino sugar metabolic process	1
	3.3e-08	76	636	23	0.036	0.303	GO:0006022	BP	2	aminoglycan metabolic process	1
	8.35e-08	115	636	28	0.044	0.243	GO:0042302	MF	1	structural constituent of cuticle	1
	4e-07	181	636	35	0.055	0.193	GO:0017144	BP	2	drug metabolic process	1
	8.75e-06	212	636	36	0.057	0.17	GO:0017171	MF	6	serine hydrolase activity	4
	8.75e-06	212	636	36	0.057	0.17	GO:0008236	MF	6	serine-type peptidase activity	3
	6.39e-05	478	636	59	0.093	0.123	GO:0070011	MF	6	peptidase activity, acting on L-amino acid peptides	2
	6.91e-05	8269	636	551	0.866	0.067	GO:0003674	MF	6	molecular_function	1
	0.000247	497	636	59	0.093	0.119	GO:0008233	MF	6	peptidase activity	1
	0.000284	192	636	31	0.049	0.161	GO:0004252	MF	6	serine-type endopeptidase activity	4
	0.000486	519	636	60	0.094	0.116	GO:0006508	BP	7	proteolysis	1
